# Supplementary material for: Directed Evolution of Acoustic Reporter Genes Using High-Throughput Acoustic Screening
Source: PubMed Central journal article supplement (PMC11264329; doi:10.1021/acssynbio.4c00283), 2024-07-09
Supplement: sb4c00283_si_003.pdf [file sb4c00283_si_003.pdf]

# Directed Evolution of Acoustic Reporter Genes Using High-Throughput Acoustic Screening

## Authors:

Robert C. Hurt<sup>1#</sup>, Zhiyang Jin<sup>2#</sup>, Mohamed Soufi<sup>3</sup>, Katie K. Wong<sup>3</sup>, Daniel P. Sawyer<sup>1</sup>, Hao K. Shen<sup>3</sup>, Przemysław Dutka,<sup>1,3</sup> Ramya Deshpande<sup>3</sup>, Ruby Zhang<sup>3</sup>, David R. Mittelstein<sup>2</sup>, Mikhail G. Shapiro<sup>2,3,4,\*</sup>

## Affiliations:

<sup>1</sup>Division of Biology and Biological Engineering

<sup>2</sup>Division of Engineering and Applied Science

<sup>3</sup>Division of Chemistry and Chemical Engineering

<sup>4</sup>Howard Hughes Medical Institute

#Equal contribution

California Institute of Technology

Pasadena, CA, USA 91125

\*Correspondence should be addressed to MGS:

Email: [mikhail@caltech.edu](mailto:mikhail@caltech.edu)

Phone: 626-395-8588

Address: 1200 E. California Blvd, MC 210-41, Pasadena, CA 91125

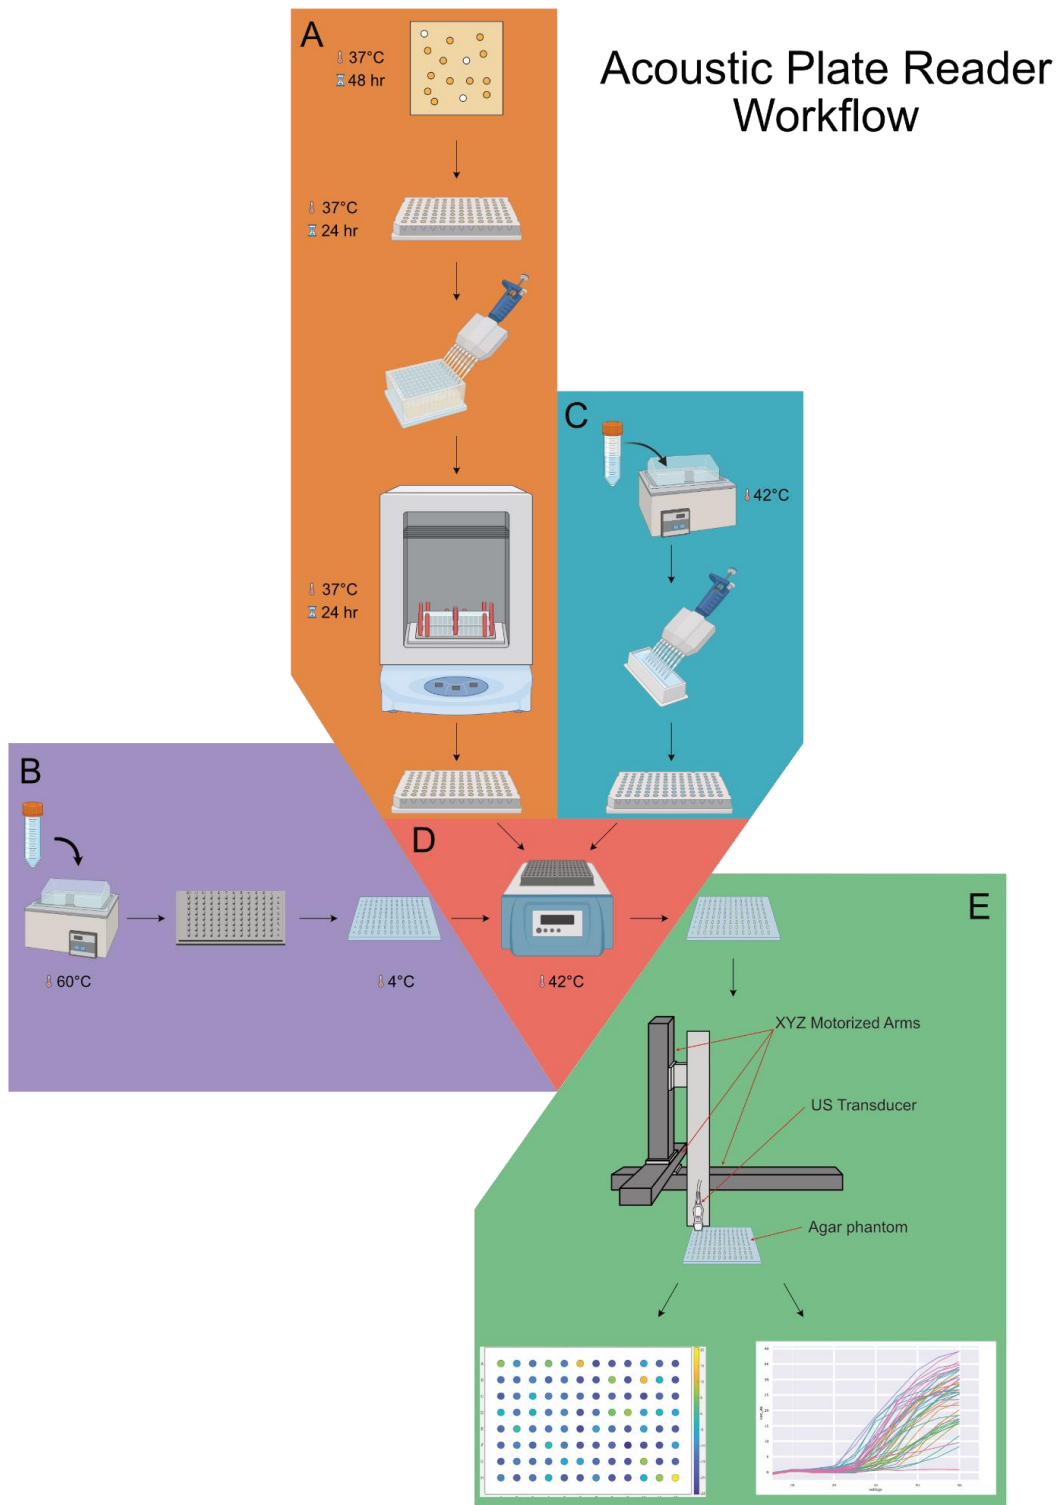

**Figure S1. Detailed diagram of the Acoustic Plate Reader workflow.** (A) GV<sub>s</sub> are expressed in *E. coli* as colonies on Petri dishes for 48 hr at 37°C, then colonies are picked into LB and grown to saturation in liquid culture for 24 hr at 37°C. These saturated liquid cultures are then diluted 1:100 into autoinduction LB and expressed for 24 hr at 37°C in 500  $\mu$ L cultures in deep-well 96-

well plates (square wells are used for maximum culture aeration; USA Scientific 1896-2800). Aliquots of these cultures are aliquoted into an un-skirted 96-well PCR plate for subsequent loading into phantoms. (B) A solution of 2% Ultrapure Agarose (Invitrogen, 16500500) is prepared in 1X PBS and incubated at 60°C for at least 12 hr to degas. Agarose phantoms are then made by pouring 75 mL of this solution into a 96-well phantom mold and incubating at 4°C for 10 min. (C) A solution of 1% low-melting-temperature agarose (Goldbio, A-204-100) is prepared in 1X PBS and incubated at 60°C for at least 12 hr to degas. This solution is then aliquoted into an un-skirted 96-well PCR plate to be used for phantom loading. (D) Phantoms from B are loaded by placing the 96-well PCR plates from A and C into 96-well heat blocks at 42°C, and combining equal volumes of culture and agarose before pipetting into the empty phantom. (E) Phantoms from D are scanned using the acoustic plate reader, which generates US data for each sample and can image up to 12 96-well phantoms in a single scan.

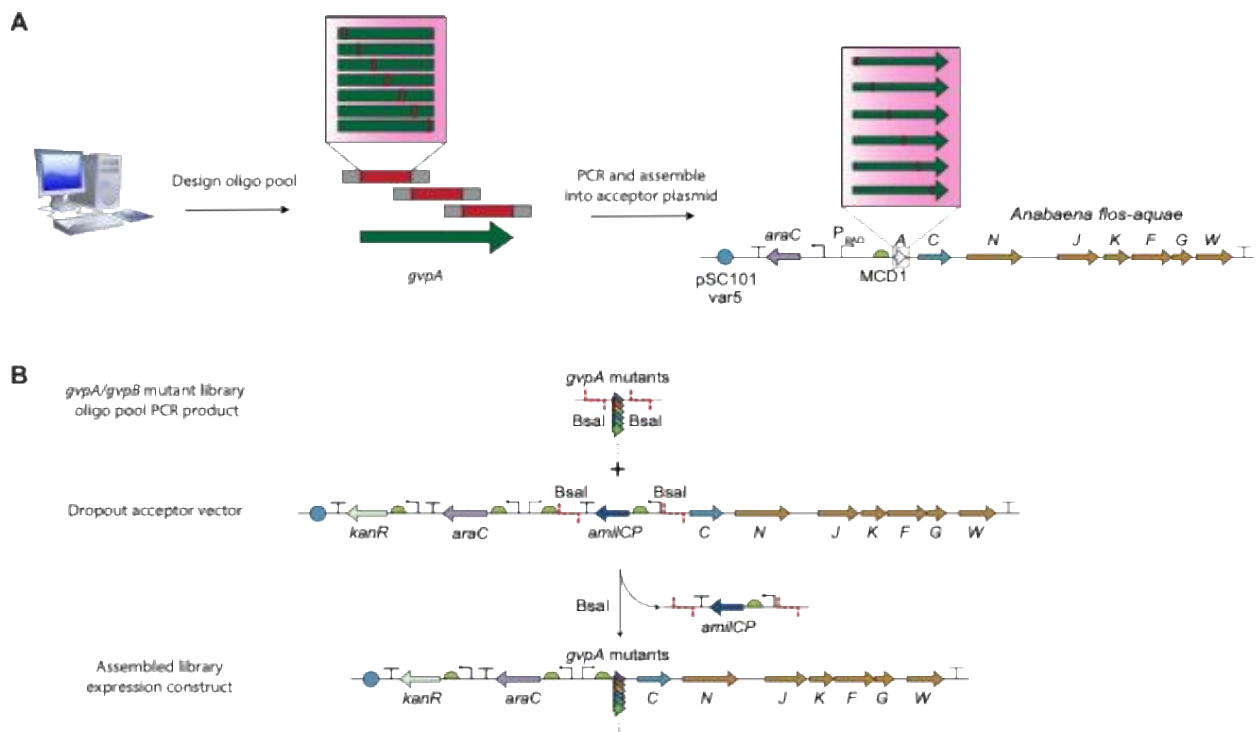

**Figure S2. Details of *gvpA/gvpB* mutant library construction.** (A) Overview of workflow for creating either scanning site saturation or recombination libraries. (B) Details of library assembly via a Golden Gate-based version of cassette mutagenesis (see Methods).

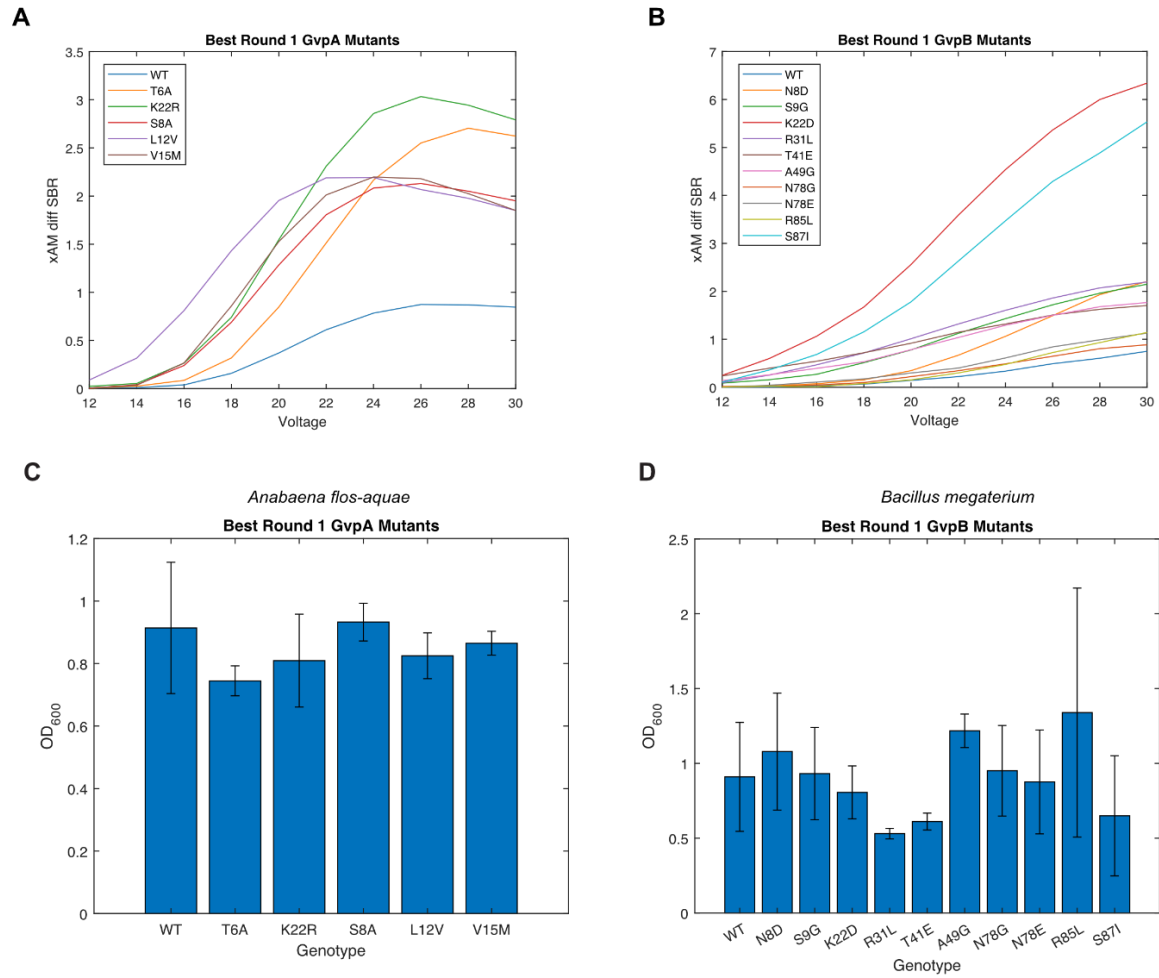

**Figure S3. Characterization of the top mutants from Round 1 of evolution.** (A-B) xAM difference SBR as a function of pressure for each of the top mutants. N=4 biological samples (each an average of 3 technical replicates). (C-D) OD<sub>600</sub> measurements for the mutants shown in A-B. N=4 biological samples.

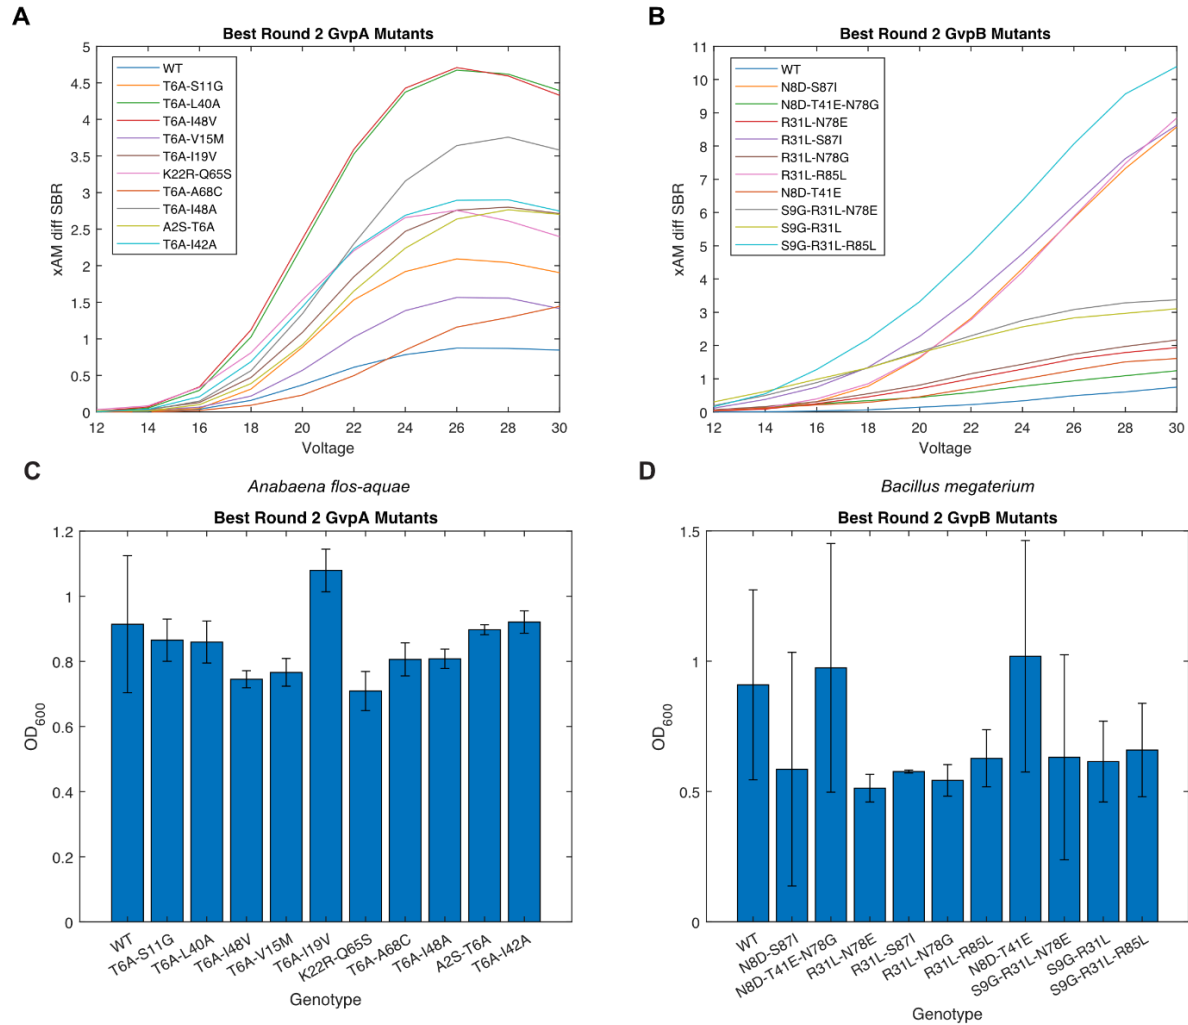

**Figure S4. Characterization of the top mutants from Round 2 of evolution.** (A-B) xAM difference SBR as a function of pressure for each of the top mutants. N=4 biological samples (each an average of 3 technical replicates). (C-D) OD600 measurements for the mutants shown in A-B. N=4 biological samples.

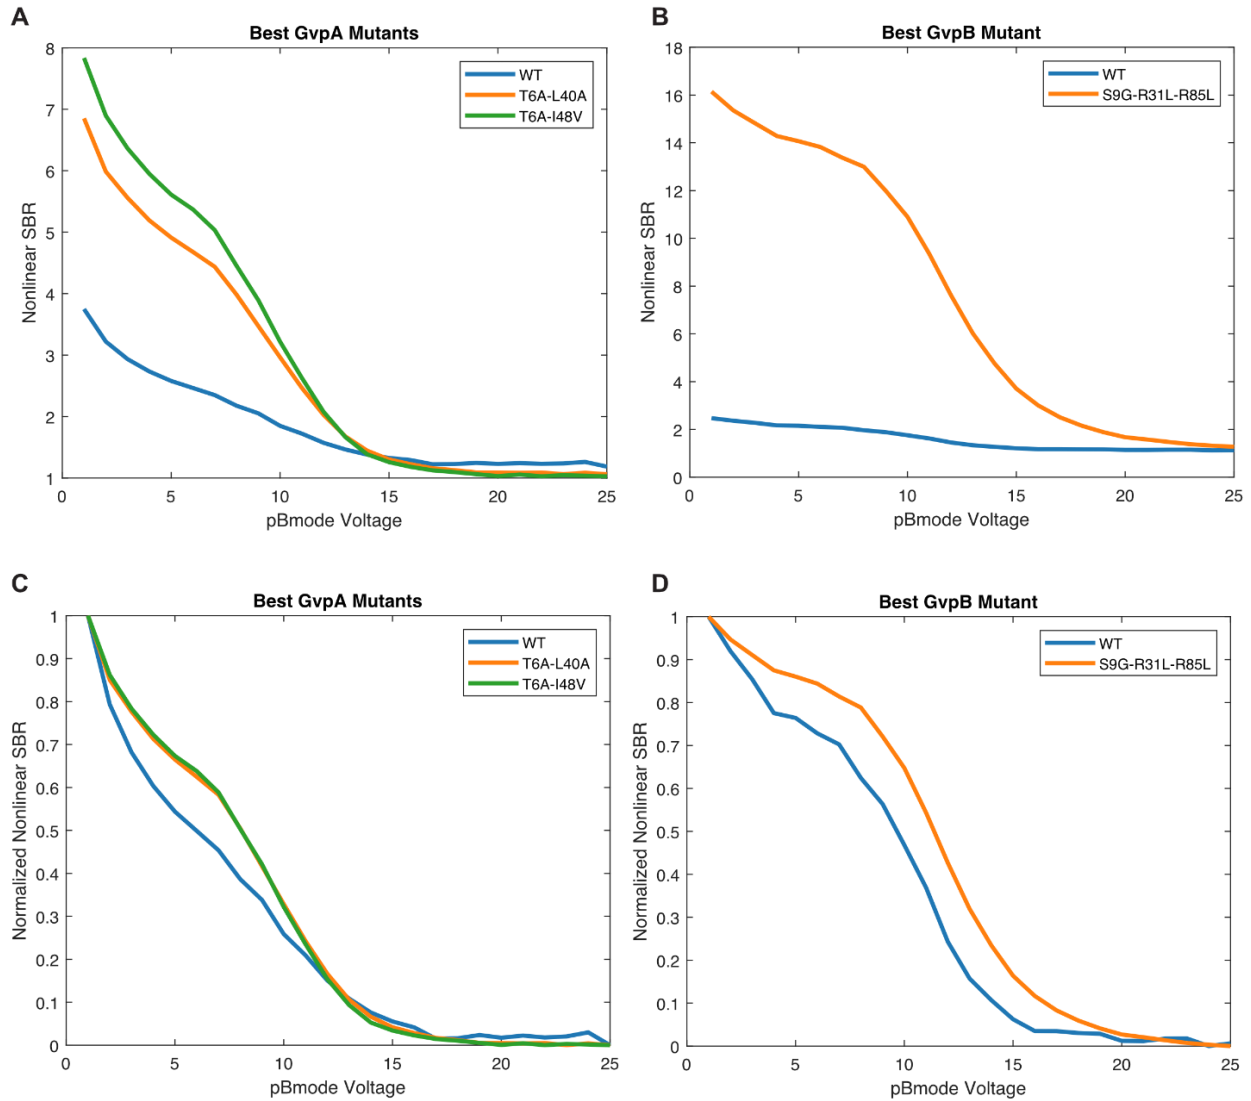

**Figure S5. Acoustic collapse pressure curves for the best mutants identified in this study.** Acoustic pressure was applied using a parabolic Bmode pulse sequence with increasing voltages, and nonlinear signals were acquired using xAM at 3.1 MPa after each voltage step. (A-B) xAM acoustic collapse pressure curves for the top-performing mutants identified in this study. (C-D) Data from A-B normalized to the same min and max. N=4 biological samples.

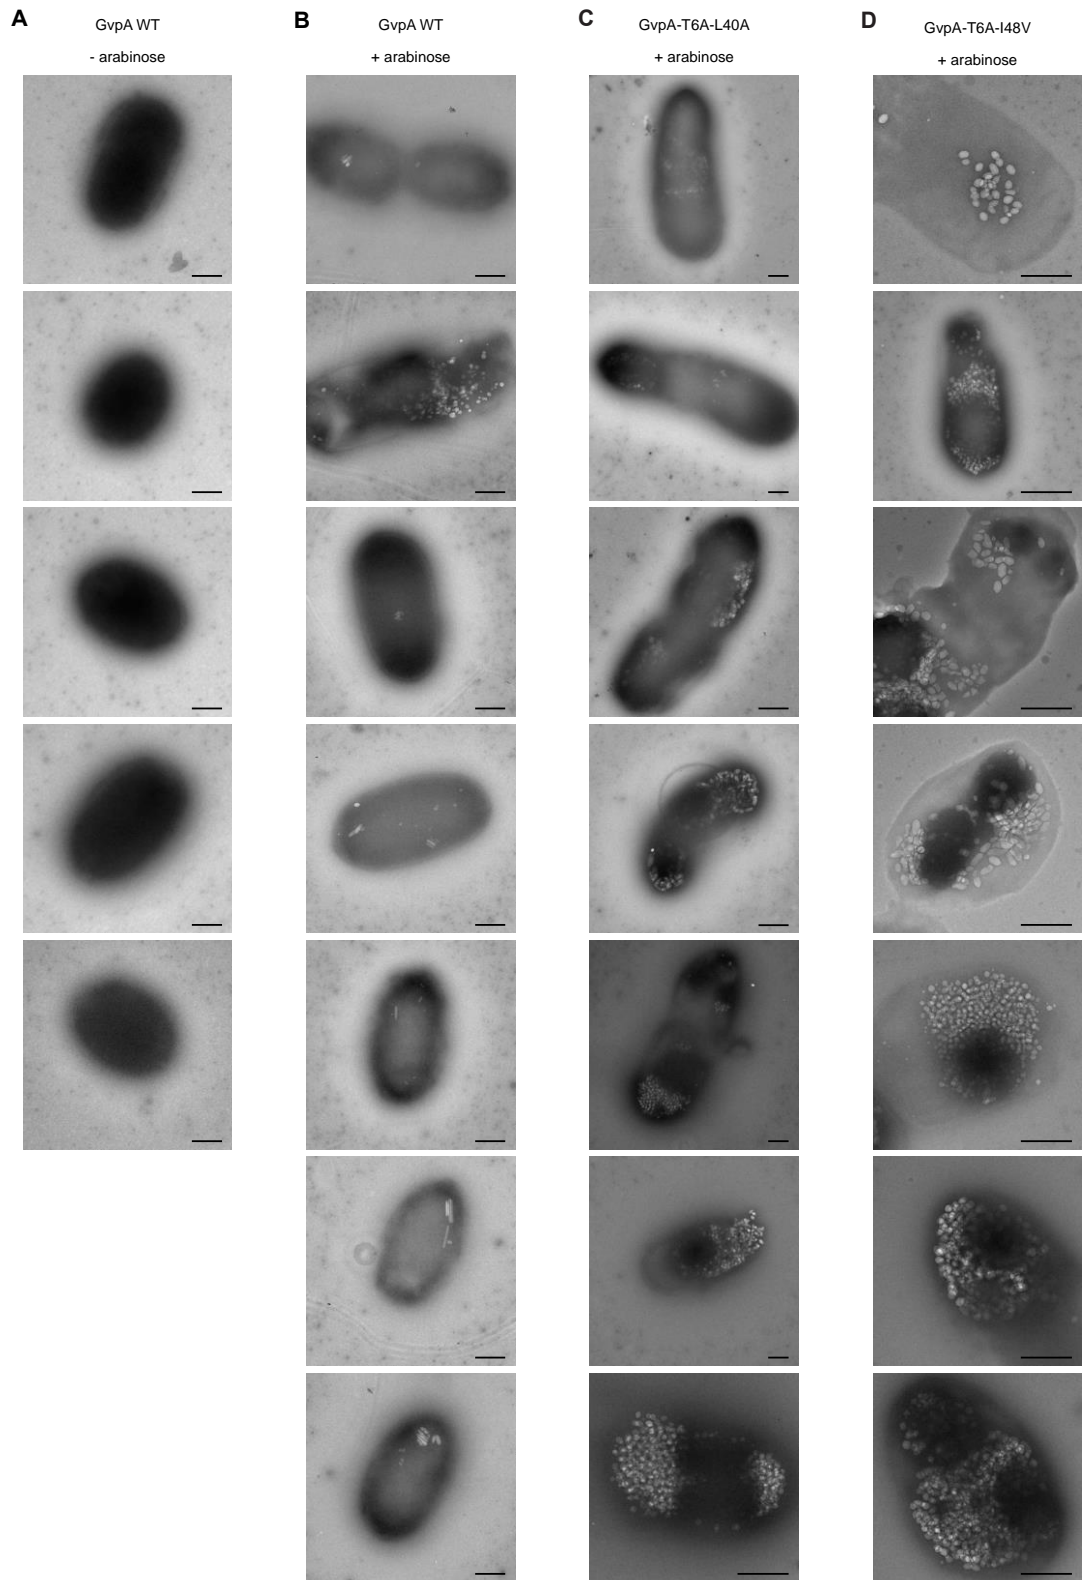

**Figure S6. TEM images of *E. coli* cells expressing WT or mutant *A. flos-aquae* GVs.** For each sample, 5-25 images were collected; a representative set is shown, ordered from least to most GVs produced per cell. Scale bars 500 nm.

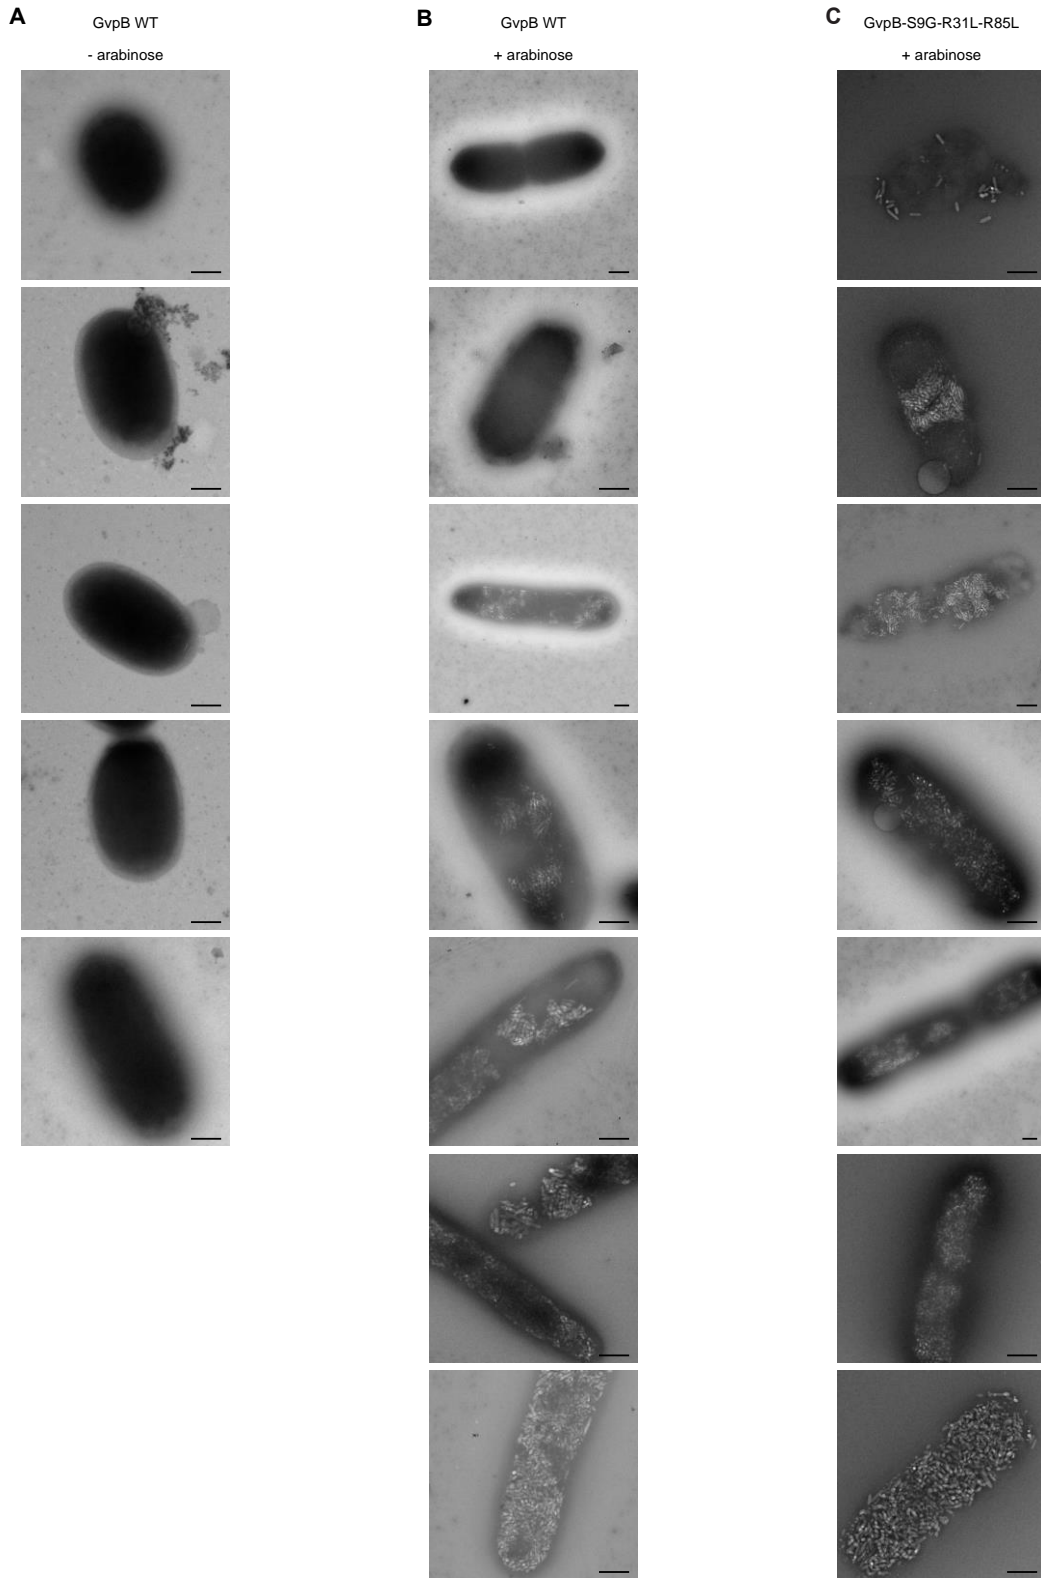

**Figure S7. TEM images of *E. coli* cells expressing WT or mutant *B. megaterium* GV. For each sample, 5-25 images were collected; a representative set is shown, ordered from least to most GV produced per cell. Scale bars 500 nm.**



### Supplementary Note 1: Golden Gate reactions

#### Master mix recipes

| Component        | Amount per reaction | Stock concentration (NEB) | For 66 reactions |
|------------------|---------------------|---------------------------|------------------|
| T4 Ligase Buffer | 1 uL                | 10X                       | 66 uL            |
| Hi-T4 DNA Ligase | 500 U               | 400 U/uL                  | 83 uL            |
| BsmBI-v2         | 15 U                | 10 U/uL                   | 100 uL           |
| Water            | to 5 uL             |                           | 81 uL            |

| Component                   | Amount per reaction | Stock concentration (NEB) | For 66 reactions |
|-----------------------------|---------------------|---------------------------|------------------|
| T4 Ligase Buffer            | 1 uL                | 10X                       | 66 uL            |
| Hi-T4 DNA Ligase            | 500 U               | 400 U/uL                  | 83 uL            |
| Bsal-HF-v2<br>or<br>BbsI-HF | 15 U                | 20 U/uL                   | 50 uL            |
| Water                       | to 5 uL             |                           | 131 uL           |

To set up reactions, combine 75 ng of the backbone part with 150 ng of each insert part in a PCR tube with 5 uL of the appropriate master mix and fill to 10 uL with water. Miniprepmed parts give higher assembly efficiencies than linear PCR products.

|                                   |
|-----------------------------------|
| Golden Gate thermocycler protocol |
| 20 min 37/42°C                    |
| 3 minutes 37/42°C                 |
| 4 minutes 16°C                    |

|                 |
|-----------------|
| Cycle 2-3 x30   |
| 10 minutes 50°C |
| 10 minutes 80°C |
| Hold 4°C        |
